# Supplementary material
Source: PubMed Central journal article supplement (PMC4226179)
Supplement: NIHMS469489-supplement-Supp_Mat.pdf [file NIHMS469489-supplement-Supp_Mat.pdf]

**A versatile synthetic extracellular matrix mimic via thiol-ene photopolymerization**

By *Benjamin D. Fairbanks, Michael P. Schwartz, Alexandra E. Halevi, Charles R. Nuttelman, Christopher N. Bowman, and Kristi S. Anseth\**

[\*]Prof. K. S. Anseth  
Department of Chemical and Biological Engineering  
and the Howard Hughes Medical Institute  
University of Colorado  
Boulder, Colorado 80309-0424 (USA)  
E-mail: ([kristi.anseth@colorado.edu](mailto:kristi.anseth@colorado.edu))

B. D. Fairbanks, M. P. Schwartz, A. E. Halevi, C. R. Nuttelman, C. N. Bowman  
Department of Chemical and Biological Engineering  
University of Colorado  
Boulder, Colorado 80309-0424 (USA)

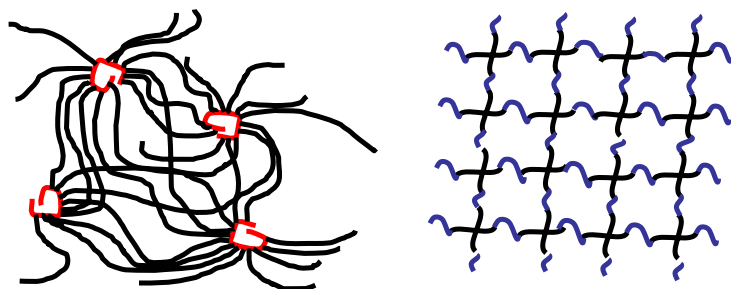

Figure S1. General network structure for radically polymerized chain growth PEG-diacrylate hydrogels (left with polyacrylate chains in red) and step-growth hydrogels (right with comonomers in blue).

$$p_c = \frac{1}{[r(f_{thiol} - 1)(f_{ene} - 1)]^{1/2}} \quad (\text{Eqn. S1})$$

The Flory-Stockmayer critical gel point equations relates the critical conversion for gelation,  $p_c$ , with respect to monomer functionality,  $f$ , and the stoichiometric ratio,  $r$ . For conditions under which  $p_c > 1$ , gelation is precluded no matter what extent of conversion is reached.

Table S1. Results of polymerization of solutions of various stoichiometric ratios. Where the critical gel point conversion for a particular ratio remained below 1, gels formed. When greater than 1, no gel formed under the polymerization conditions. Additionally, the stoichiometrically balanced polymerization exhibited the highest modulus with those of lower stoichiometric ratios exhibited lower moduli.

| Ratio norb:thiol | Stoichiometric ratio (r) | Critical gel point conversion ( $p_c$ ) | Final shear elastic modulus of gel |
|------------------|--------------------------|-----------------------------------------|------------------------------------|
| 1:1              | 1                        | 0.58                                    | 2820±320                           |
| 1:0.8            | 0.8                      | 0.65                                    | 2010±330                           |
| 0.8:1            | 0.8                      | 0.65                                    | 1820±260                           |
| 2:1              | 0.5                      | 0.82                                    | 1210±420                           |
| 1:2              | 0.5                      | 0.82                                    | 739±220                            |
| 4:1              | 0.25                     | 1.15                                    | no gel                             |
| 1:4              | 0.25                     | 1.15                                    | no gel                             |
| 100% norb        | 0                        | infinite                                | no gel                             |
| 100% thiol       | 0                        | infinite                                | no gel                             |

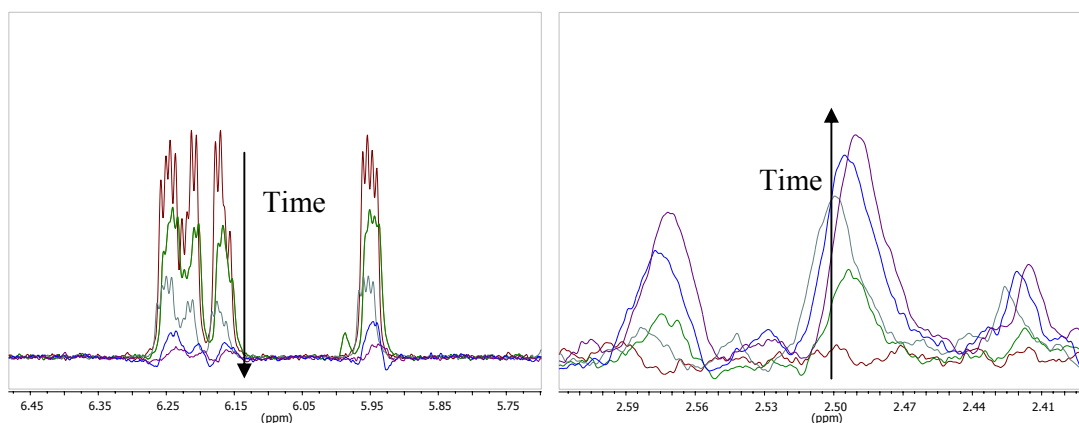

Figure S2. Spectral depletion of peaks associated with alkene protons on norbornene functional group (left) and simultaneous and proportional emergence of peaks associated with thioether  $\alpha$ -protons (right).

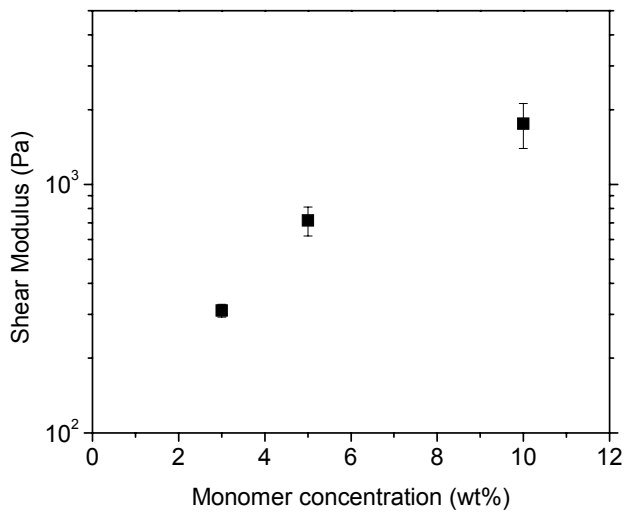

Figure S3. Shear elastic modulus for 3, 5, and 10 wt% gels.

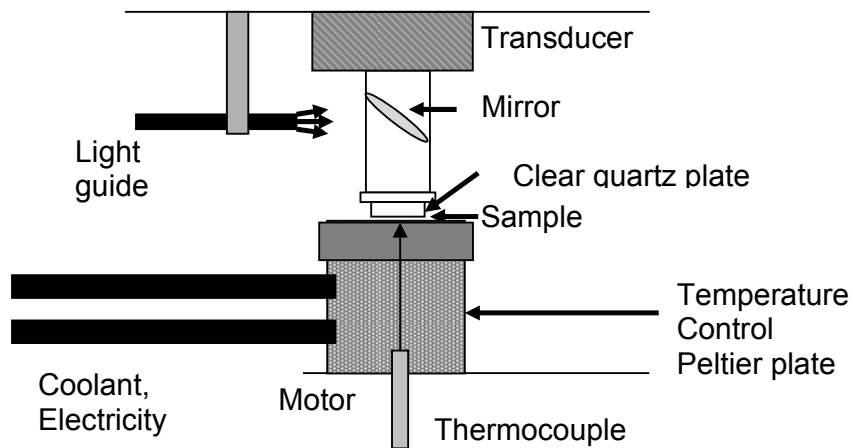

Figure S4. Schematic for photorheometer instrumentation setup. Light is directed by mirror to sample through transparent quartz plate. Motor is strain controlled. Transducer connected to upper plate and shaft. Temperature controlled by Peltier plate.

Table S2. Results from Tukey’s pair-wise comparison of means with  $\alpha=0.05$ . Here, the prefix ALA, LEU, and TRP refer to the gels crosslinked with the MMP-ALA, MMP-LEU, and MMP-TRP respectively. The numbers 0, 250, 500, and 1000 refer to the concentration, in mM, of cell adhesion ligand CRGDS present in each gel. Significant trends exist for both RGDS concentration and for crosslink degradation rate. In the table, YES indicates a significant difference and NO indicates no significant difference.

|             | ALA<br>0 | ALA<br>250 | ALA<br>500 | ALA<br>1000 | LEU<br>0 | LEU<br>250 | LEU<br>500 | LEU<br>1000 | TRP<br>0 | TRP<br>250 | TRP<br>500 | TRP<br>1000 |
|-------------|----------|------------|------------|-------------|----------|------------|------------|-------------|----------|------------|------------|-------------|
| ALA<br>0    |          | NO         | NO         | YES         | NO       |            |            |             | NO       |            |            |             |
| ALA<br>250  |          |            | NO         | YES         |          | YES        |            |             |          | YES        |            |             |
| ALA<br>500  |          |            |            | YES         |          |            | YES        |             |          |            | YES        |             |
| ALA<br>1000 |          |            |            |             |          |            |            | YES         |          |            |            | YES         |
| LEU<br>0    |          |            |            |             |          | YES        | YES        | YES         | NO       |            |            |             |
| LEU<br>250  |          |            |            |             |          |            | YES        | YES         |          | YES        |            |             |
| LEU<br>500  |          |            |            |             |          |            |            | NO          |          |            | NO         |             |
| LEU<br>1000 |          |            |            |             |          |            |            |             |          |            |            | YES         |
| TRP<br>0    |          |            |            |             |          |            |            |             |          | YES        | YES        | YES         |
| TRP<br>250  |          |            |            |             |          |            |            |             |          |            | NO         | YES         |
| TRP<br>500  |          |            |            |             |          |            |            |             |          |            |            | YES         |
| TRP<br>1000 |          |            |            |             |          |            |            |             |          |            |            |             |
